# Supplementary material
Source: publisher site journal article supplement (https://www.degruyter.com/publication/journal_key/GER/downloadAsset/GER_Instructions%20for%20Authors.pdf)
Supplement: Supplementary file 1 [file GER_Instructions%20for%20Authors.pdf]

## German Economic Review Instructions for Authors

**Submitting an article** is done online at <http://mc.manuscriptcentral.com/geer>. You will be guided through the submission process. If you cannot submit online, please contact the Editorial Office ([geer.editor@gmail.com](mailto:geer.editor@gmail.com)). *German Economic Review* does not accept submissions in hard copy.

Contributions submitted to this journal must be written in clear and concise English. Only unpublished material can be accepted, and authors may not republish their paper in the same or similar form. The decision on the acceptance is taken after a peer-reviewing procedure.

Please upload a PDF file of the entire paper for the review process (file designation: *Main Document*) and additionally a full set of original files as ZIP archive (file designation: *Source Codes (tex, cls, sty etc.) as ZIP archive*).

**Revised manuscript submission:** Authors are advised to prepare and submit responses to the referees' and editor's comments as separate documents and upload them as an *additional File for Review but NOT for publication* (file designation).

**Manuscript Style:** The language of the journal is English. Text should be typed double-spaced and size 12 font. Preferred file formats are PDFs. Upon final acceptance, files must be submitted in MS Word or Latex format. Tables and figures should be included in the main file. A full set of original files as ZIP archive (file designation: *Source Codes (tex, cls, sty etc.) as ZIP archive*) should be uploaded.

Illustrations should be of sufficient resolution for publication (300 dpi).

The manuscript should not exceed 20 typewritten pages or approximately 15 typeset pages. Short papers are more likely to receive favorable consideration.

The first page of the manuscript must contain the following information: Title of the paper, names of authors, affiliations, abstract not exceeding 100 words, JEL classification and keywords, and full address (including e-mail) of the author to whom correspondence should be directed.

Authors for whom English is a second language may choose to have their manuscript professionally edited before submission to improve the writing. An independent supplier of editing services can be found at <https://www.aje.com/?rcode=s1manuscripts>. The service is paid for and arranged by the author. Use of the service does not guarantee acceptance or preference for publication.

**Reference Style:** Papers must include a list of references at the end of the manuscript. References are to be set out in alphabetical order of the author's name. Publications by the same author should be listed in chronological order. References should be given in a standard form (please use *Chicago citation style*), as in the following examples:

*Books:* Fitzgibbons, A. (1988), *Keynes's Vision. A New Political Economy*, Clarendon, Oxford.

*Journal Articles:* Brown-Collier, E. (1988), 'The Epistemology Foundations of the General Theory', *Scottish Journal of Political Economy* 35, 227–241.

*Articles in Books:* Gerrard, B. (1992), 'Beyond the Treatise: Continuity or Change', in: B. Gerrard and J. Hillard (eds.), *The Philosophy and Economics of J. M. Keynes*, Edward Elgar, London.

**In-text citations** are by name of author and year of publication, divided by comma and in brackets: (Kohlberg and Mertens, 1986).

**Permissions for the reuse of figures:** It is the authors' responsibility to obtain permission to reproduce original or modified material that has been previously published. If you want to use material published by De Gruyter, please check the instructions on our website: <https://www.degruyter.com/publishing/services/rights-and-permissions>. If you are requesting rights for figures published by other publishers, you need to check the publisher's website for standard forms and conditions.

**Accepted Manuscripts:** After acceptance and typesetting, proofs will be sent to the author for checking. This stage is to be used only to correct errors that may have been introduced during the production process. Prompt return of the corrected proofs is appreciated.

**Data Archive:** *German Economic Review* maintains a Data Archive in cooperation with ZBW (<http://journaldata.zbw.eu/journals/ger>).

Authors of accepted papers are expected to submit a complete set of all data used for their analysis in electronic form as ZIP archive. These replication files should include the data used, program files, and a documentation files in electronic form.

Upon acceptance, you will be asked to upload your replication files to ScholarOne (<http://mc.manuscriptcentral.com/geer>). For the upload, please use the file designation *Replication files for publication in Data Archive (ZIP archive only)*.

If some of the data cannot be disseminated because of licensing or confidentiality requirements, please submit a statement with your replication files stating the exact reason why the data cannot be shared. If possible, include detailed instructions on how the data can be obtained by others. Please use the comment box within the submission process for your statement.

**For authors interested in open access publication:** If your manuscript is accepted, open access publication is available for *German Economic Review* authors who wish to make their article freely available on De Gruyter Online. Authors choosing to publish open access pay an article processing charge. All articles undergo peer review and will be accepted for publication based on the quality of their scientific contribution. Choosing open access publication has no influence on the peer review or acceptance process. For more information on De Gruyter's open access policies please visit: <http://www.degruyter.com/open-access>.

Please contact the Editorial Office with any further question:

Dr. Nora Strecker  
E-mail: [geer.editor@gmail.com](mailto:geer.editor@gmail.com)  
<http://www.degruyter.com/journals/ger>  
German Economic Review
